# Supplementary material for: Clinical Significance of the Interaction between Human Papillomavirus (HPV) Type 16 and Other High-Risk Human Papillomaviruses in Women with Cervical Intraepithelial Neoplasia (CIN) and Invasive Cervical Cancer
Source: J Oncol. 2020 Oct 26;2020:6508180. doi: 10.1155/2020/6508180 (PMC7648694; doi:10.1155/2020/6508180)
Supplement: Supplementary Materials — Table 5: HPV type 16 confection with either HPV18, HPV33, HPV51, HPV52, or HPV66 and residual disease after conization. Legend. HPV: human papillomavirus. CIN: cervical intraepithelial disease. Figure 1: flow chart of the cases recruited and follow-up. Legend: FU: follow-up, ASCUS: atypical squamous cells of undetermined significance; LSIL: low-grade squamous intraepithelial lesion; LEEP: loop electroexcision procedure. [file 6508180.f1.zip]

Archive with 2 entries (2 files):
- 6508180.f1/fgure 1.docx
- 6508180.f1/table 5.odt
