# Supplementary material for: Clinical Significance of the Interaction between Human Papillomavirus (HPV) Type 16 and Other High-Risk Human Papillomaviruses in Women with Cervical Intraepithelial Neoplasia (CIN) and Invasive Cervical Cancer
Source: J Oncol. 2020 Oct 26;2020:6508180. doi: 10.1155/2020/6508180 (PMC7648694; doi:10.1155/2020/6508180)
Supplement: Supplementary Materials — Table 5: HPV type 16 confection with either HPV18, HPV33, HPV51, HPV52, or HPV66 and residual disease after conization. Legend. HPV: human papillomavirus. CIN: cervical intraepithelial disease. Figure 1: flow chart of the cases recruited and follow-up. Legend: FU: follow-up, ASCUS: atypical squamous cells of undetermined significance; LSIL: low-grade squamous intraepithelial lesion; LEEP: loop electroexcision procedure. [file 6508180.f1.zip › 6508180.f1/table 5.odt]

Ectocervical Residual Disease
Endocervical Residual Disease

Negative n=888 (%)
CIN1
n= 168 (%)
CIN 2-3
n=245 (%)
Negative 
n= 1120 (%)
CIN1
n= 83 (%)
CIN 2-3 
n= 98 (%)
HPV16/HPV 18 negative
555 (62.5)
109 (64.9)
137 (55.9)
692 (61.8)
52 (62.7)
57 (58.2)
HPV16/HPV18 positive
41 (4.6)
5 (3)
13 (5.3)
52 (4.6)
1 (1.2)
6 (6.1)
Single HPV 16
152 (17.1)
33 (19.6)
47 (19.2)
201 (17.9)
18 (21.7)
13 (13.3)
Single HPV 18
22 (2.5)
2 (1.2)
3 (1.2)
23 (2.1)
3 (3.6)
1 (1)
Multiple HPV 16
96 (10.8)
17 (10.1)
38 (15.5)
123 (11)
8 (9.6)
20 (20.4)
Multiple HPV 18
22 (2.5)
2 (1.2)
7 (2.9)
29 (2.6)
1 (1.2)
1 (1)
HPV16/HPV51 negative
510 (57.4)
103 (61.3)
129 (52.7)
641 (57.2)
50 (60.2)
51 (52)
HPV 16/HPV51 positive
26 (2.9)
3 (1.8)
6 (2.4)
30 (2.7)
3 (3.6)
2 (2)
Single HPV 16
152 (17.1)
33 (19.6)
47 (19.2)
201 (17.9)
18 (21.7)
13 (13.3)
Single HPV 51
46 (5.2)
5 (3)
9 (3.7)
52 (4.6)
5 (6)
3 (3.1)
Multiple HPV 16
111 (12.5)
19 (11.3)
45 (18.4)
145 (12.9)
6 (7.2)
24 (24.5)
Multiple HPV 51
 43 (4.8)
5 (3)
9 (3.7)
51 (4.6)
1 (1.2)
5 (5.1)
HPV16/HPV52  negative
438 (49.3)
87 (51.8)
103 (42)
550 (49.1)
43 (51.8)
35 (35.7)
HPV 16/HPV52 positive
56 (6.3)
7 (4.2)
26 (10.6)
73 (6.5)
4 (4.8)
12 (12.2)
Single HPV 16
152 (17.1)
33 (19.6)
47 (19.2)
201 (17.9)
18 (21.7)
13 (13.3)
Single HPV 52
69 (7.8)
12 (7.1)
20 (8.2)
83 (7.4)
7 (8.5)
11 (1.2)
Multiple HPV 16
81 (9.1)
15 (8.9)
25 (10.2)
102 (9.1)
5 (6)
14 (14.3)
Multiple HPV 52
92 (10.4)
14 (8.3)
24 (9.8)
111 (9.9)
6 (7.2)
13 (13.3)
HPV16/HPV66 negative
552 (62.2)
104 (61.9)
137 (55.9)
684 (61.1)
52 (62.7)
57 (58.2)
HPV 16/HPV66 positive
6 (0.7)
3 (1.8)
2 (0.8)
8 (0.7)
2 (2.4)
1 (1)
Single HPV 16
152 (17.1)
33 (19.6)
47 (19.2)
201 (17.9)
18 (21.7)
13 (13.3)
Single HPV 66
22 (2.5)
4 (2.4)
7 (2.9)
29 (2.6)
3 (3.6)
1 (1)
Multiple HPV 16
131 (14.8)
19 (11.3)
49 (20)
167 (14.9)
7 (8.4)
25 (25.5)
Multiple HPV 66
25 (2.8)
5 (3)
3 (1.2)
31 (2.8)
1 (1.2)
1 (1)
HPV16/HPV33 negative
703 (79.2)
139 (82.7)
190 (77.6)
891 (79.6)
71 (85.5)
70 (71.4)
HPV 16/HPV33 positive
16 (1.8)
3 (1.8)
4 (1.6)
20 (1.8)
0 (-)
3 (3.1)
Single HPV 16
31 (3.5)
10 (6)
9 (3.7)
43 (3.8)
3 (3.6)
4 (4.1)
Single HPV 33
14 (1.6)
4 (2.4)
4 (1.6)
17 (1.5)
4 (4.8)
1 (1)
Multiple HPV 16
19 (2.1)
2 (1.2)
5 (2)
24 (2.1)
0 (-)
2 (2)
Multiple HPV 33
105 (11.8)
10 (6)
33 (13.5)
125 (11.2)
5 (6)
18 (18.4)
